# Supplementary material for: Carbon quantum dot decorated hollow In2S3 microspheres with efficient visible-light-driven photocatalytic activities
Source: Royal Society of Chemistry journal article supplement (doi:10.1039/c6ra01348a), 2016-01-01
Supplement: c6ra01348a1.pdf [file c6ra01348a1.pdf]

## Supporting Information

### **Carbon quantum dots decorated hollow In<sub>2</sub>S<sub>3</sub> microspheres with efficient visible-light-driven photocatalytic activities**

Changyou Huang<sup>a</sup>, Yuanzhi Hong<sup>b</sup>, Xu Yan<sup>c</sup>, Lisong Xiao<sup>a</sup>, Kai Huang<sup>a</sup>, Wei Gu<sup>a</sup>,  
Kuili Liu<sup>d</sup>, Weidong Shi<sup>a,\*</sup>

<sup>a</sup>School of Chemistry and Chemical Engineering, Jiangsu University, Zhenjiang,  
212013, P. R. China

<sup>b</sup>School of Materials Science and Engineering, Jiangsu University, Zhenjiang, 212013,  
P. R. China

<sup>c</sup>School of Energy and Power Engineering, Jiangsu University, Zhenjiang, 212013, P.  
R. China

<sup>d</sup>Department of Physics and Electronic Engineering, Zhoukou Normal University,  
Zhoukou, 466001, P. R. China

*\*Corresponding author: Tel.: +86 511 8879 0187 Fax: +86 511 8879 1108*

*E-mail address: [swd1978@ujs.edu.cn](mailto:swd1978@ujs.edu.cn) (W. Shi)*

## Contents list

Fig. S1 EDX images of the pure  $\text{In}_2\text{S}_3$  sample (a) and 3wt% CQDs/ $\text{In}_2\text{S}_3$  sample (b).

Fig. S2 XPS spectrum of  $\text{In}_2\text{S}_3$  sample: C 1s.

Fig. S3 the adsorption-desorption equilibrium between photocatalysts and MO molecules under dark.

Fig. S4. The photocatalytic activities of pure  $\text{In}_2\text{S}_3$  (a) and 3wt% CQDs/ $\text{In}_2\text{S}_3$  (b) samples for MO degradation under infrared light.

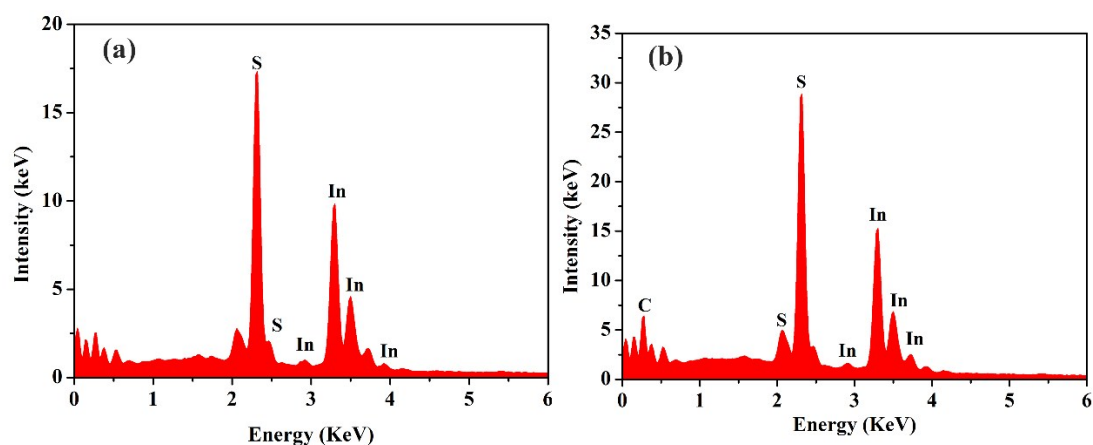

Fig. S1 EDX images of the pure  $\text{In}_2\text{S}_3$  sample (a) and 3wt% CQDs/ $\text{In}_2\text{S}_3$  sample (b).

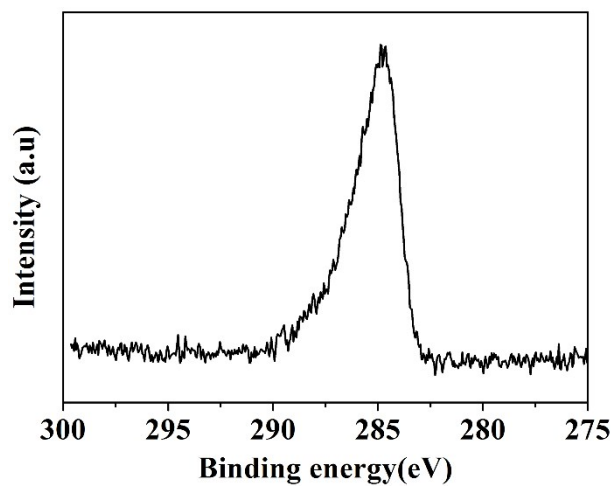

Fig. S2 XPS spectra of  $\text{In}_2\text{S}_3$  sample: C 1s.

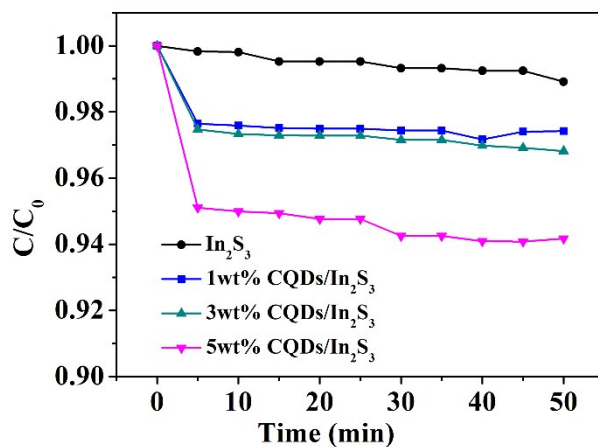

Fig. S3 the adsorption-desorption equilibrium between photocatalysts and MO molecules under dark.

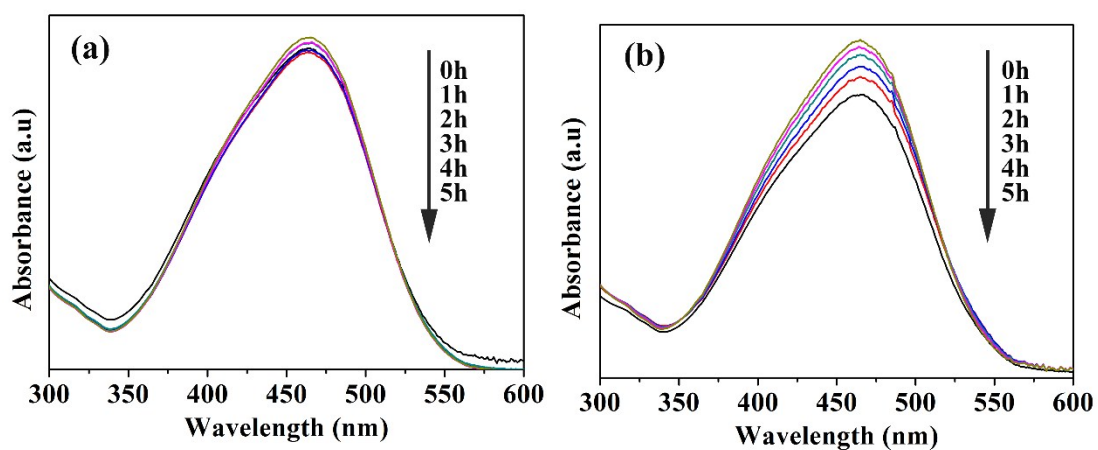

Fig. S4. The photocatalytic activities of pure  $\text{In}_2\text{S}_3$  (a) and 3wt% CQDs/ $\text{In}_2\text{S}_3$  (b) samples for MO degradation under infrared light.
